# Supplementary material for: Comparative Omics Analysis of Brassica napus Roots Subjected to Six Individual Macronutrient Deprivations Reveals Deficiency-Specific Genes and Metabolomic Profiles
Source: MDPI journal article supplement (doi:10.3390/ijms222111679), 2021-10-28
Supplement: s1 [file s1]

**Supplementary data SD7:** Kinetic of photosynthesis activity of *Brassica napus* subjected to six individual macronutrient deprivations during 9 days.

|         | Photosynthesis ( $\mu\text{mol.CO}_2.\text{m}^{-2}.\text{s}^{-1}$ ) |                  |                   |
|---------|---------------------------------------------------------------------|------------------|-------------------|
|         | Day 3                                                               | Day 6            | Day 9             |
| Control | 17.13 $\pm$ 1.83                                                    | 19.2 $\pm$ 2.09  | 18.16 $\pm$ 1.47  |
| -N      | 14.52 $\pm$ 1.18                                                    | 15.23 $\pm$ 1.21 | 6.94* $\pm$ 1.29  |
| -Mg     | 16.09 $\pm$ 1.06                                                    | 19.4 $\pm$ 0.81  | 14.35 $\pm$ 2.74  |
| -P      | 13.62 $\pm$ 1.43                                                    | 16.42 $\pm$ 1.52 | 12.74* $\pm$ 1.36 |
| -S      | 13.47 $\pm$ 1.51                                                    | 20.05 $\pm$ 1.39 | 19.39 $\pm$ 1.35  |
| -K      | 18.44 $\pm$ 1.91                                                    | 20.79 $\pm$ 2.07 | 21.51 $\pm$ 1.41  |
| -Ca     | 15.46 $\pm$ 1.09                                                    | 17.78 $\pm$ 2.88 | 19.86 $\pm$ 1.94  |
