# Supplementary material for: Comparative Omics Analysis of Brassica napus Roots Subjected to Six Individual Macronutrient Deprivations Reveals Deficiency-Specific Genes and Metabolomic Profiles
Source: MDPI journal article supplement (doi:10.3390/ijms222111679), 2021-10-28

**Supplementary data SD2:** (A) Nucleotidic sequences of primers for amplification by RT-qPCR of housekeeping (EF1- $\alpha$  and 18s RNA) or target genes used for RNAseq validation. (B) Correlation between log2fold change ratio from RNAseq analysis and  $2^{-DDCt}$  of target genes.

A

| Gene ID       | Primers sequences                                                        |
|---------------|--------------------------------------------------------------------------|
| EF1- $\alpha$ | Forward 5'-TTTCGAGGGTGACAACATGA<br>Reverse 5'-CCGTTCCAATACCAACAATC       |
| 18 S          | Forward 5'-CGGATAACCGTAGTAATTCTAG<br>Reverse 5'-GTA CTCA TTCCAATTACCAGAC |
| BnaA03g43750D | Forward 5'-CCAGAAGGTGTTATGGCTATG<br>Reverse 5'-TGGAGAAGCTGCACCATTTCCA    |
| BnaA10g25800D | Forward 5'-CTAATGGACGCATGGTTCTCAC<br>Reverse 5'-GAGATCAAACACATGTGGCTCC   |
| BnaA02g35870D | Forward 5'-TTCATAGCGGCTGGTCCTAAAC<br>Reverse 5'-CACTAGCTCTCACGAACACAAC   |
| BnaA02g35870D | Forward 5'-TTCATAGCGGCTGGTCCTAAAC<br>Reverse 5'-TTCATAGCGGCTGGTCCTAAAC   |
| BnaC02g44160D | Forward 5'-GGTGTGAAGAGAGTGAAGAGC<br>Reverse 5'-CACTAGCTCTCACGAACACAAC    |
| BnaC02g44160D | Forward 5'-GGTGTGAAGAGAGTGAAGAGC<br>Reverse 5'-ACGTTGTCGTCAGTGAAGAGTG    |
| BnaC03g56990D | Forward 5'-GTGATATCGGGAATGACAGGAG<br>Reverse 5'-ATTGAGGATGAGTTGTGGCACG   |
| BnSultr1.1    | Forward 5'-AGATATTGCGATCGGACCAG<br>Reverse 5'-GAAAACGCCAGCAAAGAAAG       |

B

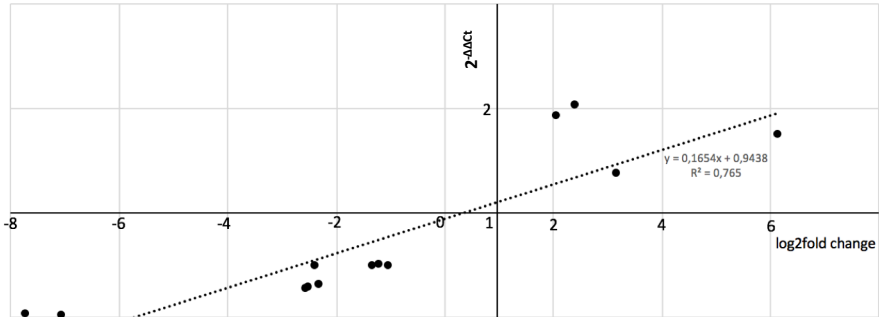

Supplement: s1 [file s1]
